# Supplementary material for: Multifunctional copolyfluorene containing pendant benzimidazolyl groups: applications in chemical sensors and electroluminescent devices
Source: Royal Society of Chemistry journal article supplement (doi:10.1039/c2py20506h), 2012-01-01
Supplement: c2py20506h.pdf [file c2py20506h.pdf]

## Supporting Information

### **Multifunctional copolyfluorene containing pendant benzimidazolyl groups: Applications in chemical sensors and electroluminescent devices**

**Chia-Shing Wu, Chao-Te Liu and Yun Chen\***

*Department of Chemical Engineering, National Cheng Kung University, Tainan, Taiwan*

\* Corresponding author. Telephone: +886-2085843. Fax: +886-2344496.

E-Mail: yunchen@mail.ncku.edu.tw

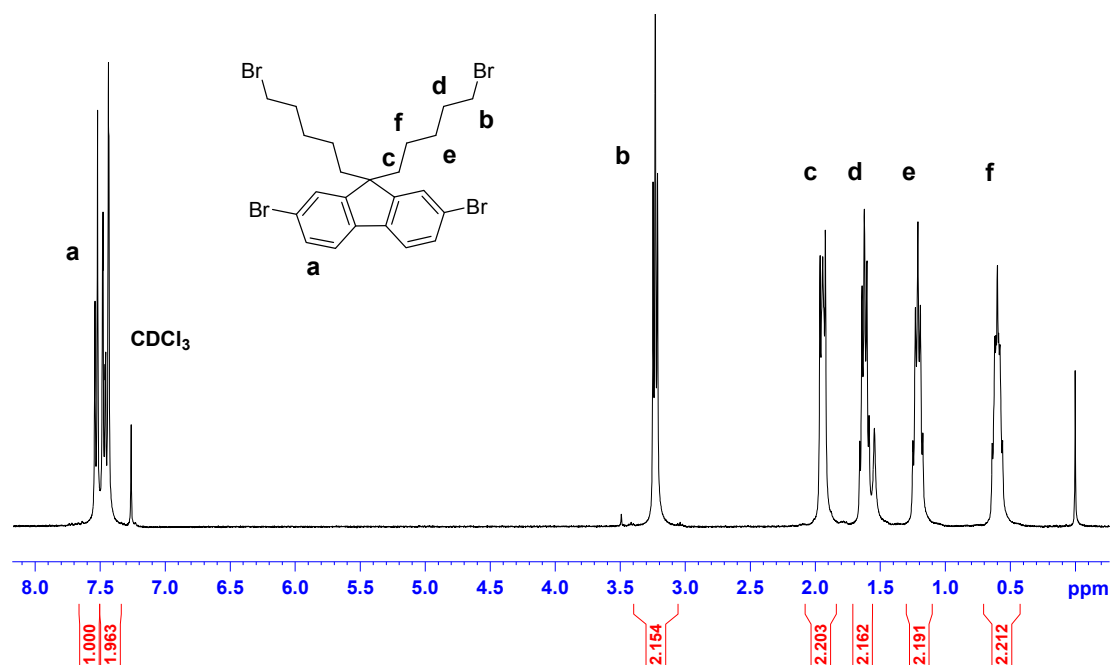

**Figure S1.** <sup>1</sup>H NMR spectrum of monomer 3.

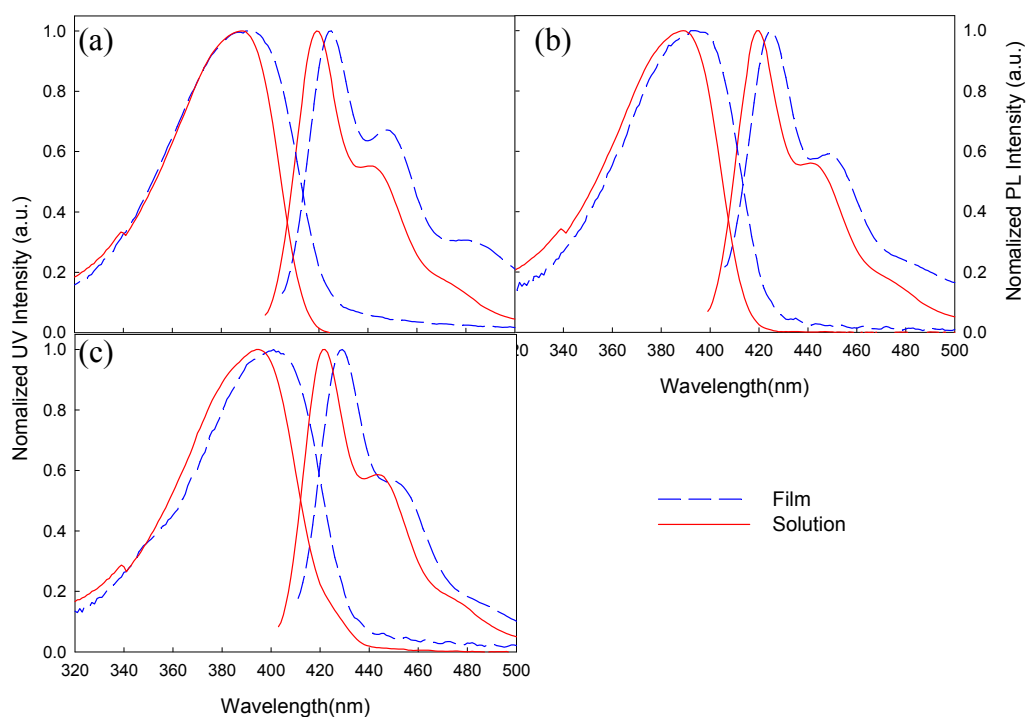

**Figure S2.** Normalized absorption spectra and photoluminescence (PL) emission spectra of (a) **PF** (b) **PFBr** (c) **PFBI** in THF solution and in the film state. The concentration of polymer was  $1.0 \times 10^{-5}$  M repeating unit. Excitation wavelength was 389 nm.

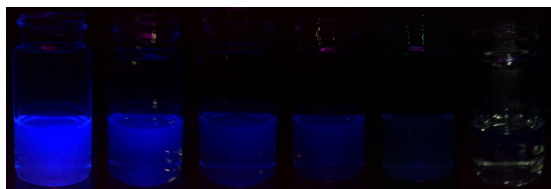

**Figure S3.** Photographs of **PFBI** solutions with different concentration of  $\text{Cu}^{2+}$ . (a) 0 M (b)  $1.0 \times 10^{-5}$  M (c)  $2.5 \times 10^{-5}$  M (d)  $5.0 \times 10^{-5}$  M (e)  $7.5 \times 10^{-5}$  M (f)  $1.0 \times 10^{-4}$  M.

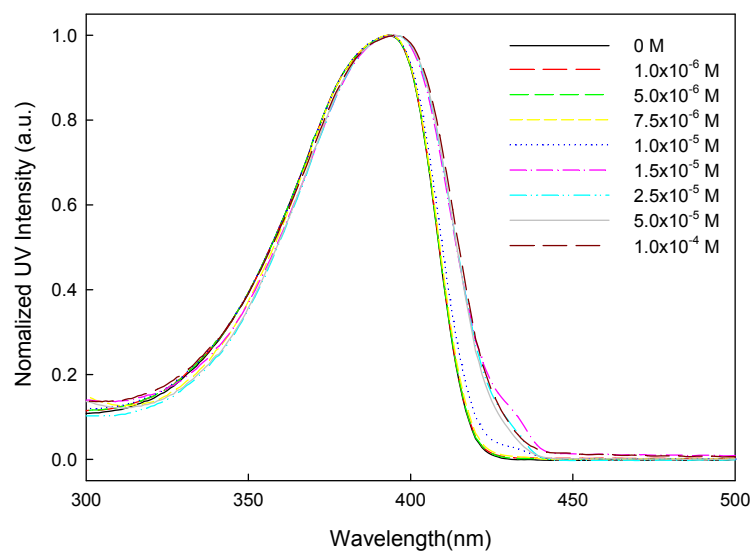

**Figure S4.** Normalized absorption spectra of **PFBI** with various concentration of  $\text{Zn}^{2+}$  in solution (THF/Water = 9/1, v/v). The concentration of **PFBI** was  $1.0 \times 10^{-5}$  M repeating unit.
